# Supplementary material for: Feasibility of in-home electroencephalographic and actigraphy recordings in dogs
Source: Frontiers journal article supplement (doi:10.3389/fvets.2023.1240880), 2024-01-08
Supplement: Data_Sheet_1.PDF [file Data_Sheet_1.PDF]

# Epilepsy and Behaviour Questionnaire-INTAKE

Start of Block: Section A: General information

General Information

-----

Please provide your first and last name.

\_\_\_\_\_

-----

Please provide your dog's first and last name.

\_\_\_\_\_

-----

Has your dog been previously diagnosed with idiopathic epilepsy by a veterinarian?

☐ Yes

☐ No

End of Block: Section A: General information

-----

Start of Block: Section B: Seizure characteristics

Seizure Characteristics

-----

What age (in years) did your dog receive his/her idiopathic epilepsy diagnosis?

\_\_\_\_\_

What do your dog's seizures look like? Please describe in the text box below, including possible triggers, changes in behaviour pre/post seizure, and changes in mentation and bodily control during the seizure.

---

---

---

---

---

On average, how long do your dog's seizures last?

- ☐ Less than 10 seconds
- ☐ Between 10 and 30 seconds
- ☐ Between 30 seconds to 1 minute
- ☐ Between 1 minute and 3 minutes
- ☐ Greater than 3 minutes

Approximately how many seizures has your dog had in the last:

Hour: : \_\_\_\_\_

Day: : \_\_\_\_\_

Week: : \_\_\_\_\_

Month: : \_\_\_\_\_

Year: : \_\_\_\_\_

Total : \_\_\_\_\_

Has your dog been previously prescribed anti-seizure drugs?

☐ Yes

☐ No

End of Block: Section B: Seizure characteristics

---

Start of Block: Section B.1: Anti-seizure drugs

Seizure Treatment

---

What anti-seizure drugs has your dog been prescribed in the past that he/she is no longer taking? Select yes or no for each drug option.

|                                                                                         | Yes                   | No                    |
|-----------------------------------------------------------------------------------------|-----------------------|-----------------------|
| Phenobarbital                                                                           | <input type="radio"/> | <input type="radio"/> |
| Potassium bromide                                                                       | <input type="radio"/> | <input type="radio"/> |
| Levetiracetam                                                                           | <input type="radio"/> | <input type="radio"/> |
| Zonisamide                                                                              | <input type="radio"/> | <input type="radio"/> |
| Premidone                                                                               | <input type="radio"/> | <input type="radio"/> |
| Other: please specify (write 'none' in the box below and select 'No' if not applicable) | <input type="radio"/> | <input type="radio"/> |

---

Is your dog currently taking anti-seizure drugs?

☐ Yes

☐ No

End of Block: Section B.1: Anti-seizure drugs

---

Start of Block: Section C: Medical history

Medical History

---

Does your dog have any other medical conditions that have been diagnosed by a veterinarian?

☐ Yes, please specify: \_\_\_\_\_

☐ No

---

Has your dog been diagnosed with any behavioural disorders by a veterinarian or animal behaviour specialist?

☐ Yes, please specify: \_\_\_\_\_

☐ No

---

Do you have any additional concerns about your dog's health or behaviour that have not yet been identified by a veterinarian?

☐ Yes, please specify: \_\_\_\_\_

☐ No

End of Block: Section C: Medical history

---

Start of Block: Section D: Environmental preferences

## Environmental Preferences

---

Approximately how many hours are you (or another member of your household) at home with your dog on a weekday?

- ☐ Less than 4 hours
  - ☐ Between 4 to 8 hours
  - ☐ Between 8 to 12 hours
  - ☐ More than 12 hours
- 

Approximately how many hours do you (or another member of your household) spend in close contact with your dog in a day (i.e., he/she is following you, sitting at your feet or on your lap, etc.)

- ☐ Less than 1 hour
  - ☐ Between 1-3 hours
  - ☐ Between 3-6 hours
  - ☐ More than 6 hours
-

Approximately how many hours does your dog sleep during the day?

- ☐ Less than 2 hours
- ☐ Between 2-4 hours
- ☐ Between 4-6 hours
- ☐ Between 6-8 hours
- ☐ More than 8 hours
- 

Where does your dog sleep during the day? Select yes or no for each sleeping location.

|              | Yes                   | No                    |
|--------------|-----------------------|-----------------------|
| On the floor | <input type="radio"/> | <input type="radio"/> |
| Dog bed      | <input type="radio"/> | <input type="radio"/> |
| Crate        | <input type="radio"/> | <input type="radio"/> |
| Human bed    | <input type="radio"/> | <input type="radio"/> |
| Couch/chair  | <input type="radio"/> | <input type="radio"/> |
| Unsure       | <input type="radio"/> | <input type="radio"/> |
| Other        | <input type="radio"/> | <input type="radio"/> |

---

Approximately how many hours does your dog sleep during the night?

- ☐ Less than 4 hours
- ☐ Between 4-8 hours
- ☐ Between 8-12 hours
- ☐ More than 12 hours
- 

Where does your dog sleep during the night? Select yes or no for each sleeping location.

|                            | Yes                   | No                    |
|----------------------------|-----------------------|-----------------------|
| On the floor               | <input type="radio"/> | <input type="radio"/> |
| Dog bed                    | <input type="radio"/> | <input type="radio"/> |
| Crate                      | <input type="radio"/> | <input type="radio"/> |
| Human bed (with you)       | <input type="radio"/> | <input type="radio"/> |
| Human bed (different room) | <input type="radio"/> | <input type="radio"/> |
| Couch/chair                | <input type="radio"/> | <input type="radio"/> |
| Unsure                     | <input type="radio"/> | <input type="radio"/> |
| Other                      | <input type="radio"/> | <input type="radio"/> |

---

Over the last 7 days, what has been your dog's ability to sleep without moving or getting up (restful sleep)? For the 6 prompts below, choose a number between 1 (never) and 10 (constant) that best describes your dog's ability to sleep.

|                                                                                            | Never | Sometimes | About half the time | Most of the time | Constant |                                                                                    |   |   |   |    |
|--------------------------------------------------------------------------------------------|-------|-----------|---------------------|------------------|----------|------------------------------------------------------------------------------------|---|---|---|----|
|                                                                                            | 1     | 2         | 3                   | 4                | 5        | 6                                                                                  | 7 | 8 | 9 | 10 |
| Moves (relocates to a new area in your home):                                              |       |           |                     |                  |          |  |   |   |   |    |
| Twitches (quick and rigid movements of the feet, legs, head, or body):                     |       |           |                     |                  |          |  |   |   |   |    |
| Vocalizes:                                                                                 |       |           |                     |                  |          |  |   |   |   |    |
| Dreams (twitching and vocalizing at the same time):                                        |       |           |                     |                  |          |  |   |   |   |    |
| Shifts position (changes sleeping position. i.e., from laying on belly to laying on side): |       |           |                     |                  |          |  |   |   |   |    |
| Paces:                                                                                     |       |           |                     |                  |          |  |   |   |   |    |

How many meals is your dog fed in one day?

- ☐ 1 meal
- ☐ 2 meals
- ☐ 3 meals
- ☐ More than 3 meals



How does your dog typically eat their food? Select yes or no for each feeding option.

|                | Yes                   | No                    |
|----------------|-----------------------|-----------------------|
| Grazing        | <input type="radio"/> | <input type="radio"/> |
| In one sitting | <input type="radio"/> | <input type="radio"/> |
| Puzzle feeder  | <input type="radio"/> | <input type="radio"/> |
| Other          | <input type="radio"/> | <input type="radio"/> |

On average, how many times does your dog visit their water bowl in a day?

- ☐ Less than 5 times
- ☐ Between 5-10 times
- ☐ Between 10-15 times
- ☐ More than 15 times
- ☐ Unsure

What kind of exercise does your dog get on a normal day? Select yes or no for each exercise option.

|                            | Yes                   | No                    |
|----------------------------|-----------------------|-----------------------|
| On-leash walk              | <input type="radio"/> | <input type="radio"/> |
| Off-leash walk             | <input type="radio"/> | <input type="radio"/> |
| On-leash running           | <input type="radio"/> | <input type="radio"/> |
| Off-leash running          | <input type="radio"/> | <input type="radio"/> |
| Playtime with toys inside  | <input type="radio"/> | <input type="radio"/> |
| Playtime with toys outside | <input type="radio"/> | <input type="radio"/> |
| Playtime with other dogs   | <input type="radio"/> | <input type="radio"/> |
| Sports/agility             | <input type="radio"/> | <input type="radio"/> |
| Other                      | <input type="radio"/> | <input type="radio"/> |

On average, how many minutes of exercise does your dog get on a normal day?

- ☐ Less than 30 minutes
- ☐ 30-60 minutes
- ☐ 60-90 minutes
- ☐ 90-120 minutes
- ☐ More than 120 minutes

On average, what other kinds of enrichment does your dog experience on a daily basis? Select yes or no for each enrichment activity.

|                  | Yes                   | No                    |
|------------------|-----------------------|-----------------------|
| Chewing on bones | <input type="radio"/> | <input type="radio"/> |
| Food puzzles     | <input type="radio"/> | <input type="radio"/> |
| Training         | <input type="radio"/> | <input type="radio"/> |
| Games            | <input type="radio"/> | <input type="radio"/> |
| Other            | <input type="radio"/> | <input type="radio"/> |

End of Block: Section D: Environmental preferences

Start of Block: Section E: Trainability

Trainability

-----

Some dogs are more obedient and trainable than others. By checking the appropriate boxes, please indicate how trainable or obedient your dog has been in each of the following situations in the recent past.

|                                                              | Never                 | Seldom                | Sometimes             | Usually               | Always                | Not<br>observed/<br>not<br>applicable |
|--------------------------------------------------------------|-----------------------|-----------------------|-----------------------|-----------------------|-----------------------|---------------------------------------|
| When off-leash, returns immediately when called              | <input type="radio"/> | <input type="radio"/> | <input type="radio"/> | <input type="radio"/> | <input type="radio"/> | <input type="radio"/>                 |
| Obeys the "sit" command immediately                          | <input type="radio"/> | <input type="radio"/> | <input type="radio"/> | <input type="radio"/> | <input type="radio"/> | <input type="radio"/>                 |
| Obeys the "stay" command immediately                         | <input type="radio"/> | <input type="radio"/> | <input type="radio"/> | <input type="radio"/> | <input type="radio"/> | <input type="radio"/>                 |
| Seems to attend/listen closely to everything you say or do   | <input type="radio"/> | <input type="radio"/> | <input type="radio"/> | <input type="radio"/> | <input type="radio"/> | <input type="radio"/>                 |
| Slow to respond to correction or reprimands, 'thick-skinned' | <input type="radio"/> | <input type="radio"/> | <input type="radio"/> | <input type="radio"/> | <input type="radio"/> | <input type="radio"/>                 |
| Slow to learn new tricks or tasks                            | <input type="radio"/> | <input type="radio"/> | <input type="radio"/> | <input type="radio"/> | <input type="radio"/> | <input type="radio"/>                 |
| Easily distracted by interesting sites, sounds, or smells    | <input type="radio"/> | <input type="radio"/> | <input type="radio"/> | <input type="radio"/> | <input type="radio"/> | <input type="radio"/>                 |

Will fetch or attempt to fetch sticks, balls, or objects

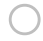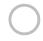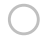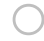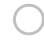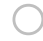

End of Block: Section E: Trainability

Start of Block: Section F: Aggression

Aggression

Some dogs display aggressive behaviour from time to time. Typical signs of moderate aggression in dogs include barking, growling, and baring teeth. More serious aggression generally includes snapping, lunging, biting, or attempting to bite. Please select a number on the 5-point scale to indicate your own dog's recent tendency to display aggressive behaviour in each of the following contexts.

|                                                                                                          | No aggression:<br>no visible signs of aggression | Minimal aggression    | Moderate aggression:<br>growling, barking, baring teeth | Moderately severe aggression | Serious aggression:<br>snaps, bites, or attempts to bite | Not observed/<br>not applicable |
|----------------------------------------------------------------------------------------------------------|--------------------------------------------------|-----------------------|---------------------------------------------------------|------------------------------|----------------------------------------------------------|---------------------------------|
| When verbally corrected or reprimanded (scolded, shouted at, etc.) by you or a household member.         | <input type="radio"/>                            | <input type="radio"/> | <input type="radio"/>                                   | <input type="radio"/>        | <input type="radio"/>                                    | <input type="radio"/>           |
| When approached directly by an unfamiliar adult while being walked/exercised on a leash.                 | <input type="radio"/>                            | <input type="radio"/> | <input type="radio"/>                                   | <input type="radio"/>        | <input type="radio"/>                                    | <input type="radio"/>           |
| When approached directly by an unfamiliar child while being walked/exercised on a leash.                 | <input type="radio"/>                            | <input type="radio"/> | <input type="radio"/>                                   | <input type="radio"/>        | <input type="radio"/>                                    | <input type="radio"/>           |
| Toward unfamiliar people approaching the dog while he/she is in your car (at a gas station for example). | <input type="radio"/>                            | <input type="radio"/> | <input type="radio"/>                                   | <input type="radio"/>        | <input type="radio"/>                                    | <input type="radio"/>           |
| When toys, bones, or other objects are taken away by a household member.                                 | <input type="radio"/>                            | <input type="radio"/> | <input type="radio"/>                                   | <input type="radio"/>        | <input type="radio"/>                                    | <input type="radio"/>           |

When bathed or groomed by a household member.

|                       |                       |                       |                       |                       |                       |                       |
|-----------------------|-----------------------|-----------------------|-----------------------|-----------------------|-----------------------|-----------------------|
| <input type="radio"/> | <input type="radio"/> | <input type="radio"/> | <input type="radio"/> | <input type="radio"/> | <input type="radio"/> | <input type="radio"/> |
|-----------------------|-----------------------|-----------------------|-----------------------|-----------------------|-----------------------|-----------------------|

When an unfamiliar person approached you or another member of your family at home.

|                       |                       |                       |                       |                       |                       |                       |
|-----------------------|-----------------------|-----------------------|-----------------------|-----------------------|-----------------------|-----------------------|
| <input type="radio"/> | <input type="radio"/> | <input type="radio"/> | <input type="radio"/> | <input type="radio"/> | <input type="radio"/> | <input type="radio"/> |
|-----------------------|-----------------------|-----------------------|-----------------------|-----------------------|-----------------------|-----------------------|

When an unfamiliar person approaches you or another member of your family away from your home.

|                       |                       |                       |                       |                       |                       |                       |
|-----------------------|-----------------------|-----------------------|-----------------------|-----------------------|-----------------------|-----------------------|
| <input type="radio"/> | <input type="radio"/> | <input type="radio"/> | <input type="radio"/> | <input type="radio"/> | <input type="radio"/> | <input type="radio"/> |
|-----------------------|-----------------------|-----------------------|-----------------------|-----------------------|-----------------------|-----------------------|

When approached directly by a household member while he/she (the dog) is eating.

|                       |                       |                       |                       |                       |                       |                       |
|-----------------------|-----------------------|-----------------------|-----------------------|-----------------------|-----------------------|-----------------------|
| <input type="radio"/> | <input type="radio"/> | <input type="radio"/> | <input type="radio"/> | <input type="radio"/> | <input type="radio"/> | <input type="radio"/> |
|-----------------------|-----------------------|-----------------------|-----------------------|-----------------------|-----------------------|-----------------------|

When mailmen or other delivery workers approach your home.

|                       |                       |                       |                       |                       |                       |                       |
|-----------------------|-----------------------|-----------------------|-----------------------|-----------------------|-----------------------|-----------------------|
| <input type="radio"/> | <input type="radio"/> | <input type="radio"/> | <input type="radio"/> | <input type="radio"/> | <input type="radio"/> | <input type="radio"/> |
|-----------------------|-----------------------|-----------------------|-----------------------|-----------------------|-----------------------|-----------------------|

When his/her food is taken away by a household member.

|                       |                       |                       |                       |                       |                       |                       |
|-----------------------|-----------------------|-----------------------|-----------------------|-----------------------|-----------------------|-----------------------|
| <input type="radio"/> | <input type="radio"/> | <input type="radio"/> | <input type="radio"/> | <input type="radio"/> | <input type="radio"/> | <input type="radio"/> |
|-----------------------|-----------------------|-----------------------|-----------------------|-----------------------|-----------------------|-----------------------|

When strangers walk past your home while your dog is outside or in the yard.

|                       |                       |                       |                       |                       |                       |                       |
|-----------------------|-----------------------|-----------------------|-----------------------|-----------------------|-----------------------|-----------------------|
| <input type="radio"/> | <input type="radio"/> | <input type="radio"/> | <input type="radio"/> | <input type="radio"/> | <input type="radio"/> | <input type="radio"/> |
|-----------------------|-----------------------|-----------------------|-----------------------|-----------------------|-----------------------|-----------------------|

When an unfamiliar person tries to touch or pet your dog.

|                       |                       |                       |                       |                       |                       |                       |
|-----------------------|-----------------------|-----------------------|-----------------------|-----------------------|-----------------------|-----------------------|
| <input type="radio"/> | <input type="radio"/> | <input type="radio"/> | <input type="radio"/> | <input type="radio"/> | <input type="radio"/> | <input type="radio"/> |
|-----------------------|-----------------------|-----------------------|-----------------------|-----------------------|-----------------------|-----------------------|

When joggers, cyclists,

|                       |                       |                       |                       |                       |                       |                       |
|-----------------------|-----------------------|-----------------------|-----------------------|-----------------------|-----------------------|-----------------------|
| <input type="radio"/> | <input type="radio"/> | <input type="radio"/> | <input type="radio"/> | <input type="radio"/> | <input type="radio"/> | <input type="radio"/> |
|-----------------------|-----------------------|-----------------------|-----------------------|-----------------------|-----------------------|-----------------------|

rollerbladers or skateboarders pass your home while your dog is outside or in the yard.

When approached directly by an unfamiliar male dog while being walked/exercised on a leash.

When approached directly by an unfamiliar female dog while being walked/exercised on a leash.

When stared at directly by a member of the household.

Toward unfamiliar dogs visiting your home.

Towards cats, squirrels, or other small animals entering your yard.

Towards unfamiliar persons visiting your home.

When barked, growled, or lunged at by another (unfamiliar) dog.

When stepped over by a member of the

☐☐☐☐☐☐☐☐☐☐☐☐☐☐☐☐☐☐☐☐☐☐☐☐☐☐☐☐☐☐☐☐☐☐☐☐☐☐☐☐☐☐☐☐☐☐☐☐



household.

When you or a household member retrieves food or objects stolen by the dog.

|                       |                       |                       |                       |                       |                       |
|-----------------------|-----------------------|-----------------------|-----------------------|-----------------------|-----------------------|
| <input type="radio"/> | <input type="radio"/> | <input type="radio"/> | <input type="radio"/> | <input type="radio"/> | <input type="radio"/> |
|-----------------------|-----------------------|-----------------------|-----------------------|-----------------------|-----------------------|

Towards another (familiar) dog in your household (select 'not applicable' if no other dogs).

|                       |                       |                       |                       |                       |                       |
|-----------------------|-----------------------|-----------------------|-----------------------|-----------------------|-----------------------|
| <input type="radio"/> | <input type="radio"/> | <input type="radio"/> | <input type="radio"/> | <input type="radio"/> | <input type="radio"/> |
|-----------------------|-----------------------|-----------------------|-----------------------|-----------------------|-----------------------|

When approached at a favourite resting/sleeping place by another (familiar) household dog (select 'not applicable' if no other dogs).

|                       |                       |                       |                       |                       |                       |
|-----------------------|-----------------------|-----------------------|-----------------------|-----------------------|-----------------------|
| <input type="radio"/> | <input type="radio"/> | <input type="radio"/> | <input type="radio"/> | <input type="radio"/> | <input type="radio"/> |
|-----------------------|-----------------------|-----------------------|-----------------------|-----------------------|-----------------------|

When approached while eating by another (familiar) household dog (select 'not applicable' if no other dogs).

|                       |                       |                       |                       |                       |                       |
|-----------------------|-----------------------|-----------------------|-----------------------|-----------------------|-----------------------|
| <input type="radio"/> | <input type="radio"/> | <input type="radio"/> | <input type="radio"/> | <input type="radio"/> | <input type="radio"/> |
|-----------------------|-----------------------|-----------------------|-----------------------|-----------------------|-----------------------|

When approached while playing with/chewing a favourite toy, bone, object, etc., by another (familiar) household dog (select 'not applicable' if no other dogs).

|                       |                       |                       |                       |                       |                       |
|-----------------------|-----------------------|-----------------------|-----------------------|-----------------------|-----------------------|
| <input type="radio"/> | <input type="radio"/> | <input type="radio"/> | <input type="radio"/> | <input type="radio"/> | <input type="radio"/> |
|-----------------------|-----------------------|-----------------------|-----------------------|-----------------------|-----------------------|

Are there any other situations in which your dog is sometimes aggressive? If so, please describe briefly:

---

---

---

---

---

End of Block: Section F: Aggression

---

Start of Block: Section G: Fear and Anxiety

Fear and Anxiety

---

Dogs sometimes show signs of anxiety or fear when exposed to particular sounds, objects, persons, or situations. Typical signs of mild to moderate fear include: avoiding eye contact, avoidance of the feared object; crouching or cringing with tail lowered or tucked between the legs; whimpering or whining, freezing, and shaking or trembling. Extreme fear is characterized by exaggerated cowering, and/or vigorous attempts to escape, retreat or hide from the feared object, person or situation. Using the following 5-point scales (0=no fear, 4=extreme fear), please indicate your own dog's recent tendency to display fearful behaviour in each of the following circumstances.

|                                                                                                                                         | No<br>fear/anxiety:<br>no visible<br>signs of fear | Minimal<br>fear/anxiety | Mild to<br>moderate<br>fear/anxiety | Moderately<br>extreme<br>fear/anxiety | Extreme<br>fear:<br>cowers,<br>retreats,<br>hides,<br>etc. | Not<br>observed/<br>not<br>applicable |
|-----------------------------------------------------------------------------------------------------------------------------------------|----------------------------------------------------|-------------------------|-------------------------------------|---------------------------------------|------------------------------------------------------------|---------------------------------------|
| When<br>approached<br>directly by an<br>unfamiliar adult<br>while away from<br>your home.                                               | <input type="radio"/>                              | <input type="radio"/>   | <input type="radio"/>               | <input type="radio"/>                 | <input type="radio"/>                                      | <input type="radio"/>                 |
| When<br>approached<br>directly by an<br>unfamiliar child<br>while away from<br>your home.                                               | <input type="radio"/>                              | <input type="radio"/>   | <input type="radio"/>               | <input type="radio"/>                 | <input type="radio"/>                                      | <input type="radio"/>                 |
| In response to<br>sudden or loud<br>noises (e.g.<br>vacuum cleaner,<br>car backfire, road<br>drills, objects<br>being dropped,<br>etc.) | <input type="radio"/>                              | <input type="radio"/>   | <input type="radio"/>               | <input type="radio"/>                 | <input type="radio"/>                                      | <input type="radio"/>                 |
| When unfamiliar<br>persons visit<br>your home.                                                                                          | <input type="radio"/>                              | <input type="radio"/>   | <input type="radio"/>               | <input type="radio"/>                 | <input type="radio"/>                                      | <input type="radio"/>                 |
| When an<br>unfamiliar person<br>tries to touch or<br>pet the dog.                                                                       | <input type="radio"/>                              | <input type="radio"/>   | <input type="radio"/>               | <input type="radio"/>                 | <input type="radio"/>                                      | <input type="radio"/>                 |
| In heavy traffic.                                                                                                                       | <input type="radio"/>                              | <input type="radio"/>   | <input type="radio"/>               | <input type="radio"/>                 | <input type="radio"/>                                      | <input type="radio"/>                 |

|                                                                                                                              |                       |                       |                       |                       |                       |                       |
|------------------------------------------------------------------------------------------------------------------------------|-----------------------|-----------------------|-----------------------|-----------------------|-----------------------|-----------------------|
| In response to strange or unfamiliar objects on or near the sidewalk (e.g. plastic trash bags, leaves, flags flapping, etc.) | <input type="radio"/> | <input type="radio"/> | <input type="radio"/> | <input type="radio"/> | <input type="radio"/> | <input type="radio"/> |
| When examined/treated by a veterinarian.                                                                                     | <input type="radio"/> | <input type="radio"/> | <input type="radio"/> | <input type="radio"/> | <input type="radio"/> | <input type="radio"/> |
| During thunderstorms, firework displays, or similar events.                                                                  | <input type="radio"/> | <input type="radio"/> | <input type="radio"/> | <input type="radio"/> | <input type="radio"/> | <input type="radio"/> |
| When approached directly by an unfamiliar dog of the same or larger size.                                                    | <input type="radio"/> | <input type="radio"/> | <input type="radio"/> | <input type="radio"/> | <input type="radio"/> | <input type="radio"/> |
| When approached directly by an unfamiliar dog of a smaller size.                                                             | <input type="radio"/> | <input type="radio"/> | <input type="radio"/> | <input type="radio"/> | <input type="radio"/> | <input type="radio"/> |
| When first exposed to unfamiliar situations (e.g. first car trip, first time in elevator, first visit to veterinarian, etc.) | <input type="radio"/> | <input type="radio"/> | <input type="radio"/> | <input type="radio"/> | <input type="radio"/> | <input type="radio"/> |
| In response to wind or wind-blown objects.                                                                                   | <input type="radio"/> | <input type="radio"/> | <input type="radio"/> | <input type="radio"/> | <input type="radio"/> | <input type="radio"/> |
| When having nails clipped by a household member.                                                                             | <input type="radio"/> | <input type="radio"/> | <input type="radio"/> | <input type="radio"/> | <input type="radio"/> | <input type="radio"/> |
| When groomed or bathed by a                                                                                                  | <input type="radio"/> | <input type="radio"/> | <input type="radio"/> | <input type="radio"/> | <input type="radio"/> | <input type="radio"/> |

household member.

When having his/her feet towed by a member of the household.

When barked, growled, or lunged at by an unfamiliar dog.

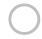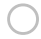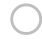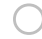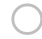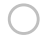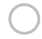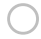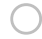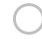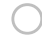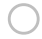

End of Block: Section G: Fear and Anxiety

Start of Block: Section H: Separation-related behaviour

Separation-Related Behaviour

-----

Some dogs show signs of anxiety or abnormal behaviour when left alone, even for relatively short periods of time. Thinking back over the recent past, how often has your dog shown each of the following signs of separation-related behaviour when left, or about to be left, on its own (check appropriate boxes).

|                                                                | Never                 | Seldom                | Sometimes             | Usually               | Always                | Not<br>observed/<br>not<br>applicable |
|----------------------------------------------------------------|-----------------------|-----------------------|-----------------------|-----------------------|-----------------------|---------------------------------------|
| Shaking, shivering, or<br>trembling                            | <input type="radio"/> | <input type="radio"/> | <input type="radio"/> | <input type="radio"/> | <input type="radio"/> | <input type="radio"/>                 |
| Excessive salivation                                           | <input type="radio"/> | <input type="radio"/> | <input type="radio"/> | <input type="radio"/> | <input type="radio"/> | <input type="radio"/>                 |
| Restlessness/agitation/pacing                                  | <input type="radio"/> | <input type="radio"/> | <input type="radio"/> | <input type="radio"/> | <input type="radio"/> | <input type="radio"/>                 |
| Whining                                                        | <input type="radio"/> | <input type="radio"/> | <input type="radio"/> | <input type="radio"/> | <input type="radio"/> | <input type="radio"/>                 |
| Barking                                                        | <input type="radio"/> | <input type="radio"/> | <input type="radio"/> | <input type="radio"/> | <input type="radio"/> | <input type="radio"/>                 |
| Howling                                                        | <input type="radio"/> | <input type="radio"/> | <input type="radio"/> | <input type="radio"/> | <input type="radio"/> | <input type="radio"/>                 |
| Chewing/scratching at doors,<br>floor, windows, curtains, etc. | <input type="radio"/> | <input type="radio"/> | <input type="radio"/> | <input type="radio"/> | <input type="radio"/> | <input type="radio"/>                 |
| Loss of appetite                                               | <input type="radio"/> | <input type="radio"/> | <input type="radio"/> | <input type="radio"/> | <input type="radio"/> | <input type="radio"/>                 |

Are there any other situations in which your dog is fearful or anxious? If so, please describe:

---



---



---



---



---

End of Block: Section H: Separation-related behaviour

---

Start of Block: Section I: Excitability

Excitability

---

Some dogs show relatively little reaction to sudden or potentially exciting events and disturbances in their environment, while others become highly excited at the slightest novelty. Signs of mild to moderate excitability include increased alertness, movement toward the source of novelty, and brief episodes of barking. Extreme excitability is characterized by a general tendency to over-react. The excitable dog barks or yelps hysterically at the slightest disturbance, rushes towards and around any source of excitement, and is difficult to calm down. Using the following 5-point scales please indicate your own dog's recent tendency to become excitable in each of the following circumstances.

|                                                                                                     | Calm: little<br>or no<br>special<br>reaction | Minimal<br>excitability | Mild to<br>moderate<br>excitability | Moderately<br>extreme<br>excitability | Extremely<br>excitable:<br>over-<br>reacts,<br>hard to<br>calm down | Not<br>observed/not<br>applicable |
|-----------------------------------------------------------------------------------------------------|----------------------------------------------|-------------------------|-------------------------------------|---------------------------------------|---------------------------------------------------------------------|-----------------------------------|
| When you<br>or other<br>members<br>of the<br>household<br>come<br>home after<br>a brief<br>absence. | <input type="radio"/>                        | <input type="radio"/>   | <input type="radio"/>               | <input type="radio"/>                 | <input type="radio"/>                                               | <input type="radio"/>             |
| When<br>playing<br>with you or<br>other<br>members<br>of your<br>household.                         | <input type="radio"/>                        | <input type="radio"/>   | <input type="radio"/>               | <input type="radio"/>                 | <input type="radio"/>                                               | <input type="radio"/>             |
| When<br>doorbell<br>rings.                                                                          | <input type="radio"/>                        | <input type="radio"/>   | <input type="radio"/>               | <input type="radio"/>                 | <input type="radio"/>                                               | <input type="radio"/>             |
| Just before<br>being<br>taken for a<br>walk.                                                        | <input type="radio"/>                        | <input type="radio"/>   | <input type="radio"/>               | <input type="radio"/>                 | <input type="radio"/>                                               | <input type="radio"/>             |
| Just before<br>being<br>taken on a<br>car trip.                                                     | <input type="radio"/>                        | <input type="radio"/>   | <input type="radio"/>               | <input type="radio"/>                 | <input type="radio"/>                                               | <input type="radio"/>             |
| When<br>visitors<br>arrive at<br>your home.                                                         | <input type="radio"/>                        | <input type="radio"/>   | <input type="radio"/>               | <input type="radio"/>                 | <input type="radio"/>                                               | <input type="radio"/>             |



---

Are there any other situations in which your dog sometimes becomes over-excited? If so, please briefly describe:

---

---

---

---

---

End of Block: Section I: Excitability

---

Start of Block: Section J: Attachment and Attention-Seeking

Attachment and Attention-Seeking Behaviour

---

Most dogs are strongly attached to their people, and some demand a great deal of attention and affection from them. Thinking back over the recent past, how often has your dog shown each of the following signs of attachment or attention-seeking.

|                                                                                             | Never                 | Seldom                | Sometimes             | Usually               | Always                | Not<br>observed/not<br>applicable |
|---------------------------------------------------------------------------------------------|-----------------------|-----------------------|-----------------------|-----------------------|-----------------------|-----------------------------------|
| Displays a strong attachment for one particular member of the household.                    | <input type="radio"/> | <input type="radio"/> | <input type="radio"/> | <input type="radio"/> | <input type="radio"/> | <input type="radio"/>             |
| Tends to follow you (or other members of the household) about the house, from room to room. | <input type="radio"/> | <input type="radio"/> | <input type="radio"/> | <input type="radio"/> | <input type="radio"/> | <input type="radio"/>             |
| Tends to sit close to, or in contact with, you (or others) when you are sitting down.       | <input type="radio"/> | <input type="radio"/> | <input type="radio"/> | <input type="radio"/> | <input type="radio"/> | <input type="radio"/>             |
| Tends to nudge, nuzzle, or paw you (or others) for attention when you are sitting down.     | <input type="radio"/> | <input type="radio"/> | <input type="radio"/> | <input type="radio"/> | <input type="radio"/> | <input type="radio"/>             |
| Becomes agitated (whines, jumps up,                                                         | <input type="radio"/> | <input type="radio"/> | <input type="radio"/> | <input type="radio"/> | <input type="radio"/> | <input type="radio"/>             |

tries to  
intervene)  
when you  
(or others)  
show  
affection  
for another  
person.

Becomes  
agitated  
(whines,  
jumps up,  
tries to  
intervene)  
when you  
show  
affection  
for another  
dog or  
animal.

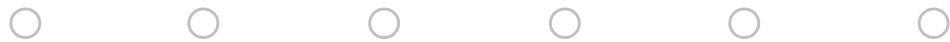

End of Block: Section J: Attachment and Attention-Seeking

---

Start of Block: Section K: Miscellaneous

Miscellaneous Behaviours

---

Dogs display a wide range of miscellaneous behaviour problems in addition to those already covered by this questionnaire. Thinking back over the recent past, please indicate how often your dog has shown any of the following behaviours:

|                                                                                         | Never                 | Seldom                | Sometimes             | Usually               | Always                | Not<br>observed/<br>not<br>applicable |
|-----------------------------------------------------------------------------------------|-----------------------|-----------------------|-----------------------|-----------------------|-----------------------|---------------------------------------|
| Chases or would chase cats given the opportunity.                                       | <input type="radio"/> | <input type="radio"/> | <input type="radio"/> | <input type="radio"/> | <input type="radio"/> | <input type="radio"/>                 |
| Chases or would chase birds given the opportunity.                                      | <input type="radio"/> | <input type="radio"/> | <input type="radio"/> | <input type="radio"/> | <input type="radio"/> | <input type="radio"/>                 |
| Chases or would chase squirrels, rabbits, or other small animals given the opportunity. | <input type="radio"/> | <input type="radio"/> | <input type="radio"/> | <input type="radio"/> | <input type="radio"/> | <input type="radio"/>                 |
| Escapes or would escape from home or yard given the chance.                             | <input type="radio"/> | <input type="radio"/> | <input type="radio"/> | <input type="radio"/> | <input type="radio"/> | <input type="radio"/>                 |
| Rolls in animal droppings or other 'smelly' substances.                                 | <input type="radio"/> | <input type="radio"/> | <input type="radio"/> | <input type="radio"/> | <input type="radio"/> | <input type="radio"/>                 |
| Chews inappropriate objects.                                                            | <input type="radio"/> | <input type="radio"/> | <input type="radio"/> | <input type="radio"/> | <input type="radio"/> | <input type="radio"/>                 |
| 'Mounts' objects, furniture, or people.                                                 | <input type="radio"/> | <input type="radio"/> | <input type="radio"/> | <input type="radio"/> | <input type="radio"/> | <input type="radio"/>                 |
| Begs persistently for food when people are eating.                                      | <input type="radio"/> | <input type="radio"/> | <input type="radio"/> | <input type="radio"/> | <input type="radio"/> | <input type="radio"/>                 |
| Steals food.                                                                            | <input type="radio"/> | <input type="radio"/> | <input type="radio"/> | <input type="radio"/> | <input type="radio"/> | <input type="radio"/>                 |
| Nervous or frightened on stairs.                                                        | <input type="radio"/> | <input type="radio"/> | <input type="radio"/> | <input type="radio"/> | <input type="radio"/> | <input type="radio"/>                 |

|                                                         |                       |                       |                       |                       |                       |                       |
|---------------------------------------------------------|-----------------------|-----------------------|-----------------------|-----------------------|-----------------------|-----------------------|
| Pulls excessively hard when on the leash.               | <input type="radio"/> | <input type="radio"/> | <input type="radio"/> | <input type="radio"/> | <input type="radio"/> | <input type="radio"/> |
| Urinate against objects/furnishings in your home        | <input type="radio"/> | <input type="radio"/> | <input type="radio"/> | <input type="radio"/> | <input type="radio"/> | <input type="radio"/> |
| Urinate when approached, handled, or picked up.         | <input type="radio"/> | <input type="radio"/> | <input type="radio"/> | <input type="radio"/> | <input type="radio"/> | <input type="radio"/> |
| Urinate when left alone at night or during the daytime. | <input type="radio"/> | <input type="radio"/> | <input type="radio"/> | <input type="radio"/> | <input type="radio"/> | <input type="radio"/> |
| Hyperactive, restless, has trouble settling down.       | <input type="radio"/> | <input type="radio"/> | <input type="radio"/> | <input type="radio"/> | <input type="radio"/> | <input type="radio"/> |
| Playful, puppyish, boisterous.                          | <input type="radio"/> | <input type="radio"/> | <input type="radio"/> | <input type="radio"/> | <input type="radio"/> | <input type="radio"/> |
| Active, energetic, always on the go.                    | <input type="radio"/> | <input type="radio"/> | <input type="radio"/> | <input type="radio"/> | <input type="radio"/> | <input type="radio"/> |
| Stares intently at nothing visible.                     | <input type="radio"/> | <input type="radio"/> | <input type="radio"/> | <input type="radio"/> | <input type="radio"/> | <input type="radio"/> |
| Snaps at (invisible) flies.                             | <input type="radio"/> | <input type="radio"/> | <input type="radio"/> | <input type="radio"/> | <input type="radio"/> | <input type="radio"/> |
| Chases own tail/hind end.                               | <input type="radio"/> | <input type="radio"/> | <input type="radio"/> | <input type="radio"/> | <input type="radio"/> | <input type="radio"/> |
| Chases/ follows shadows, light spots, etc.              | <input type="radio"/> | <input type="radio"/> | <input type="radio"/> | <input type="radio"/> | <input type="radio"/> | <input type="radio"/> |
| Barks persistently when alarmed or excited.             | <input type="radio"/> | <input type="radio"/> | <input type="radio"/> | <input type="radio"/> | <input type="radio"/> | <input type="radio"/> |
| Licks him/herself excessively.                          | <input type="radio"/> | <input type="radio"/> | <input type="radio"/> | <input type="radio"/> | <input type="radio"/> | <input type="radio"/> |
| Licks people or objects excessively.                    | <input type="radio"/> | <input type="radio"/> | <input type="radio"/> | <input type="radio"/> | <input type="radio"/> | <input type="radio"/> |

Displays other  
bizarre, strange,  
or repetitive  
behaviour (s).  
Please describe in  
the box below. If  
there are no other  
strange  
behaviours,  
please write none  
in the box below  
and select the 'not  
applicable' option.

☐☐☐☐☐☐

End of Block: Section K: Miscellaneous

---

Start of Block: Additional remarks

Please use this space to provide any additional information about your dogs habits, behaviour, and environmental preferences. Please also use this space to provide feedback regarding the questionnaire experience.

---

---

---

---

---

---

Proceeding forward will submit your questionnaire responses. Please ensure you have answered all questions to your liking before proceeding.

End of Block: Additional remarks

---

Start of Block: Section C.1: History of medications

History of Medications

---

Is your dog currently taking any medications, supplements, or other prescribed treatments for these conditions?

- ☐ Yes: please specify \_\_\_\_\_
- ☐ No

End of Block: Section C.1: History of medications

---

Start of Block: Section B.2: Current anti-seizure treatments

Current Seizure Treatments

-----

What anti-seizure drugs is your dog currently taking? Select all that apply.

- ☐ Phenobarbital
- ☐ Potassium bromide
- ☐ Levetiracetam
- ☐ Zonisamide
- ☐ Premidone
- ☐ Other: please specify \_\_\_\_\_

End of Block: Section B.2: Current anti-seizure treatments

---
